# Supplementary material for: Toward Oral Supplementation of Diamine Oxidase for the Treatment of Histamine Intolerance
Source: MDPI journal article supplement (doi:10.3390/nu14132621), 2022-06-24
Supplement: s1 [file s1]

Toward Oral Supplementation of Diamine Oxidase for the Treatment of Histamine  
Intolerance

Lucas Kettner, Ines Seitzl, Lutz Fischer\*

Department of Biotechnology and Enzyme Science,  
Institute of Food Science and Biotechnology,  
University of Hohenheim  
Garbenstr. 25, 70599 Stuttgart, Germany

\* Corresponding author: Lutz Fischer

E-mail address: [Lutz.Fischer@uni-hohenheim.de](mailto:Lutz.Fischer@uni-hohenheim.de)

Tel.: +49 711 459-22311

**Supplementary Materials**

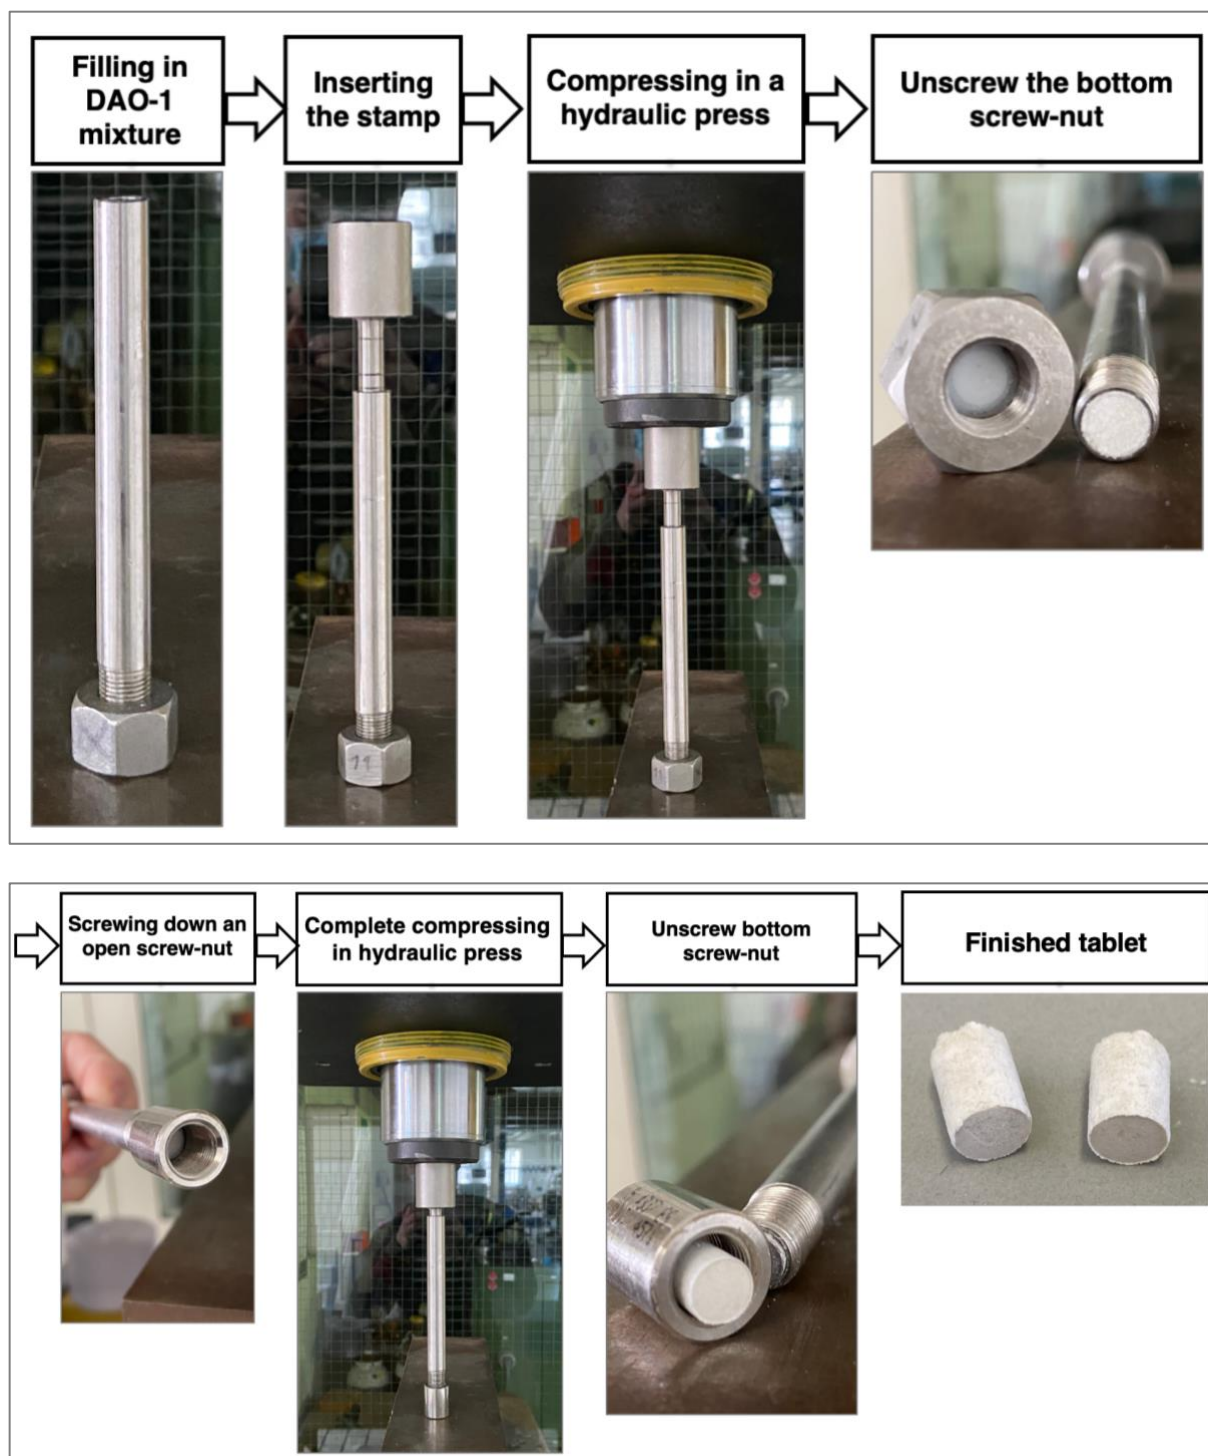

**Figure S1.** Preparation of DAO-1 tablets using a self-built tablet press.

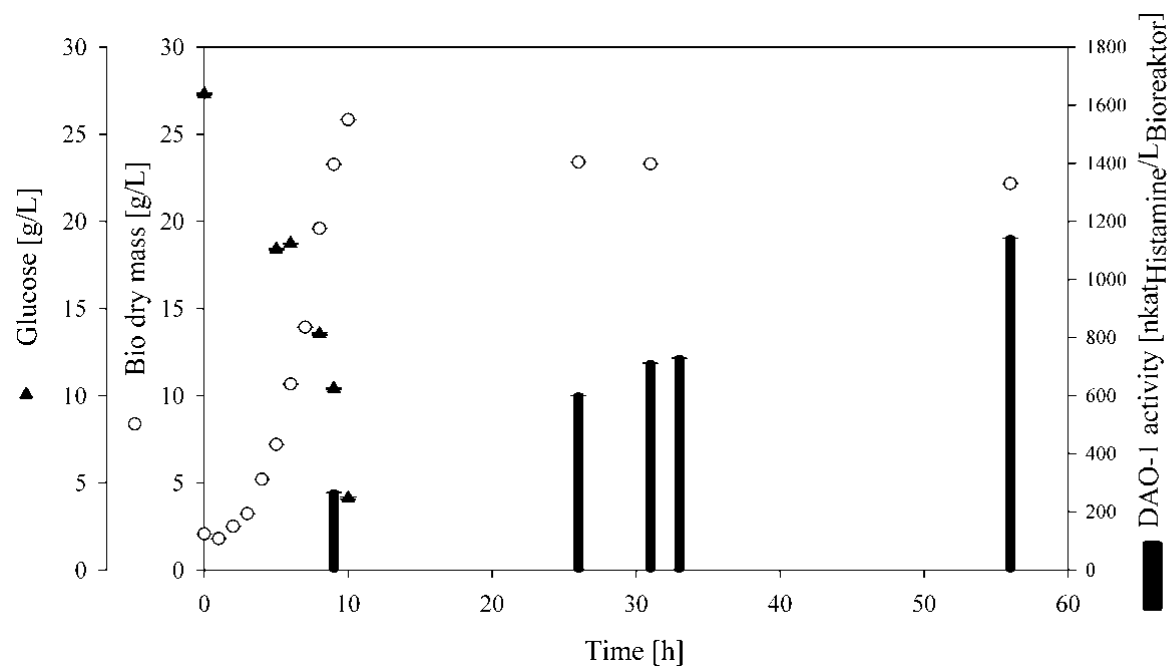

**Figure S2.** Bioreactor cultivation of *Yarrowia lipolytica\_axp\_dao-1* in YPD<sub>Ura</sub> media; working volume 5 l at 28 °C (pH 6.5). *Y. lipolytica* cells were disrupted for DAO-1 activity determinations using the TissueLyser II (Qiagen, Düsseldorf, Germany) with glass beads (0.75 mm in diameter). DAO-1 activity was determined under standard assay conditions using the DA-67 assay.

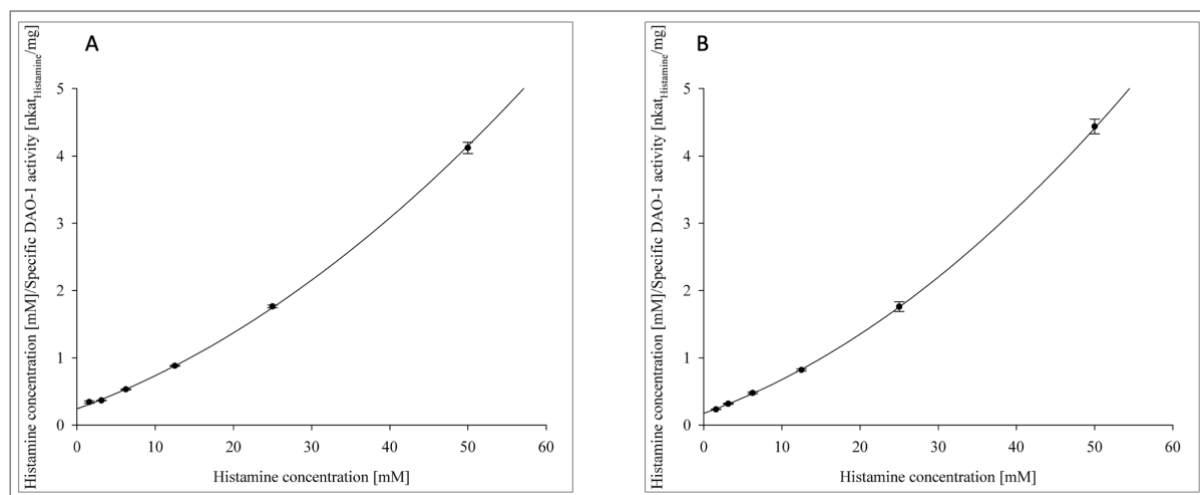

**Figure S3.** Michaelis-Menten kinetics of DAO-1 in a pancretin-free and pancretin-treated food-matrix simulated intestinal fluid (SIF 3) at 37 °C. Linearization according to Hanes-Woolf. Histamine concentration ranging from 1.56 to 50 mM.

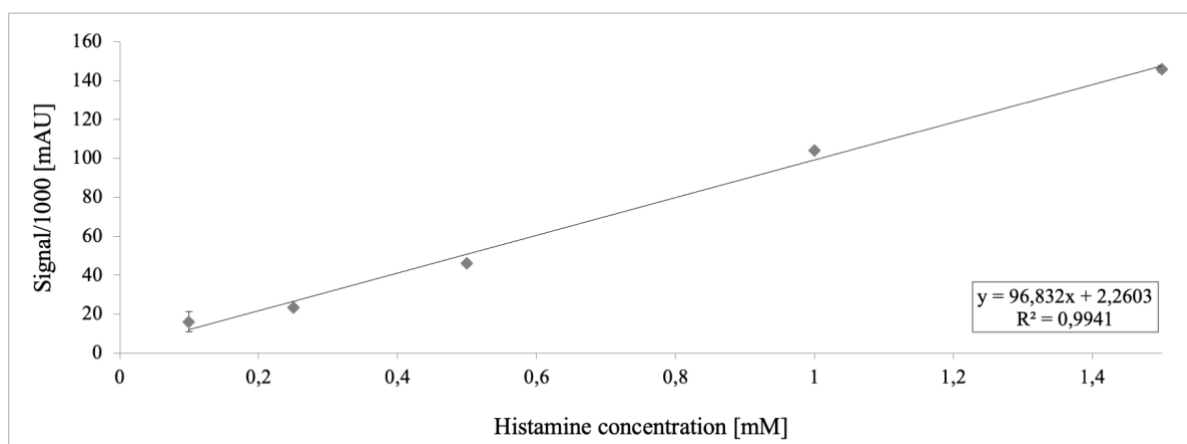

**Figure S4.** Exemplary histamine calibration for the quantification of histamine in the food-matrix SIF bioconversion samples (90 min) on the AquaC18 column (150 x 4.6 mm; 200 Å) from Phenomenex (Platinblue UHPLC system from Knauer (Berlin, Germany)). Detection at 210 nm.
